# Supplementary material for: Contextual behavioural plasticity in Italian agile frog (Rana latastei) tadpoles exposed to native and alien predator cues
Source: Oxford University Press journal article supplement (doi:10.1242/jeb.240465), 2021-04-01

**Table S1.** Fixed effects of the global linear mixed model with hatching time as response variable (n = 34).

| Variable                            | $\chi^2$ | d.f. | P            |
|-------------------------------------|----------|------|--------------|
| Treatment                           | 1.759    | 1    | 0.184        |
| Stage collection                    | 17.800   | 1    | <b>0.002</b> |
| Population                          | 2.433    | 2    | 0.296        |
| Treatment $\times$ Stage collection | 1.713    | 1    | 0.190        |
| Treatment $\times$ Population       | 2.904    | 2    | 0.234        |

**Figure S1.** Mean hatching time and standard errors for both embryonic treatments (water and predatory cues; n = 34 for each site).

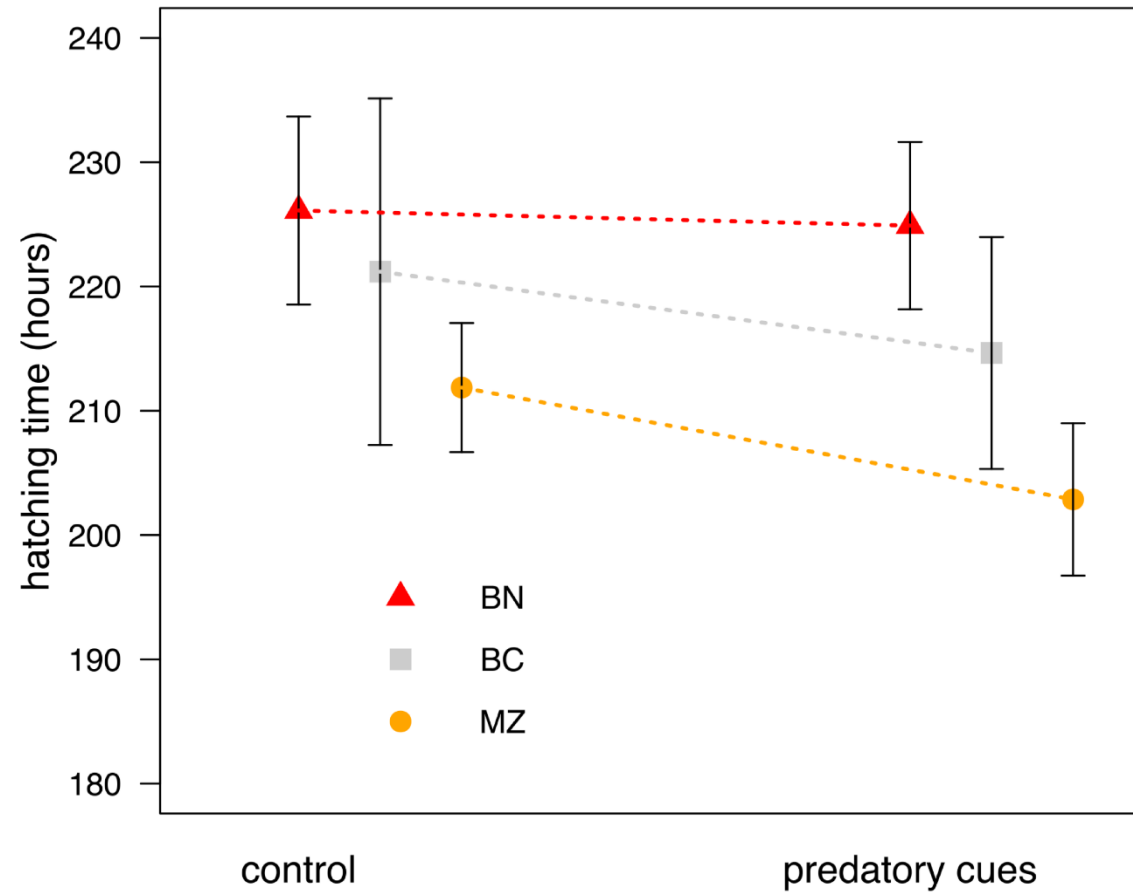

**Table S2.** Linear mixed model (LMM) with total distance post cue injection as response variable. P-values adjusted using Dunnett method (4 tests per site; n = 375).

| Contrasts (difference)    | Population  |          |          |             |          |                   |             |          |                   |
|---------------------------|-------------|----------|----------|-------------|----------|-------------------|-------------|----------|-------------------|
|                           | <i>BC</i>   |          |          | <i>MZ</i>   |          |                   | <i>BN</i>   |          |                   |
|                           | <i>Est.</i> | <i>t</i> | <i>P</i> | <i>Est.</i> | <i>t</i> | <i>P</i>          | <i>Est.</i> | <i>t</i> | <i>P</i>          |
| Fasted crayfish - control | -143        | -0.88    | 0.76     | -288        | -1.40    | 0.43              | -403        | -2.45    | <b>0.05</b>       |
| Fed crayfish - control    | -234        | -1.40    | 0.40     | -681        | -4.21    | <b>&lt; 0.001</b> | -556        | -3.44    | <b>0.002</b>      |
| Fasted odonate - control  | -262        | -1.60    | 0.32     | -344        | -2.1     | 0.11              | -617        | -3.82    | <b>&lt; 0.001</b> |
| Fed odonate - control     | -284        | -1.73    | 0.25     | -819        | -5.07    | <b>&lt; 0.001</b> | -678        | -4.13    | <b>&lt; 0.001</b> |

**Figure S2.** Individual reaction norms showing total path length (“total distance”) before and after the injection of chemical cues (n = 375; n = 25 for each subplot).

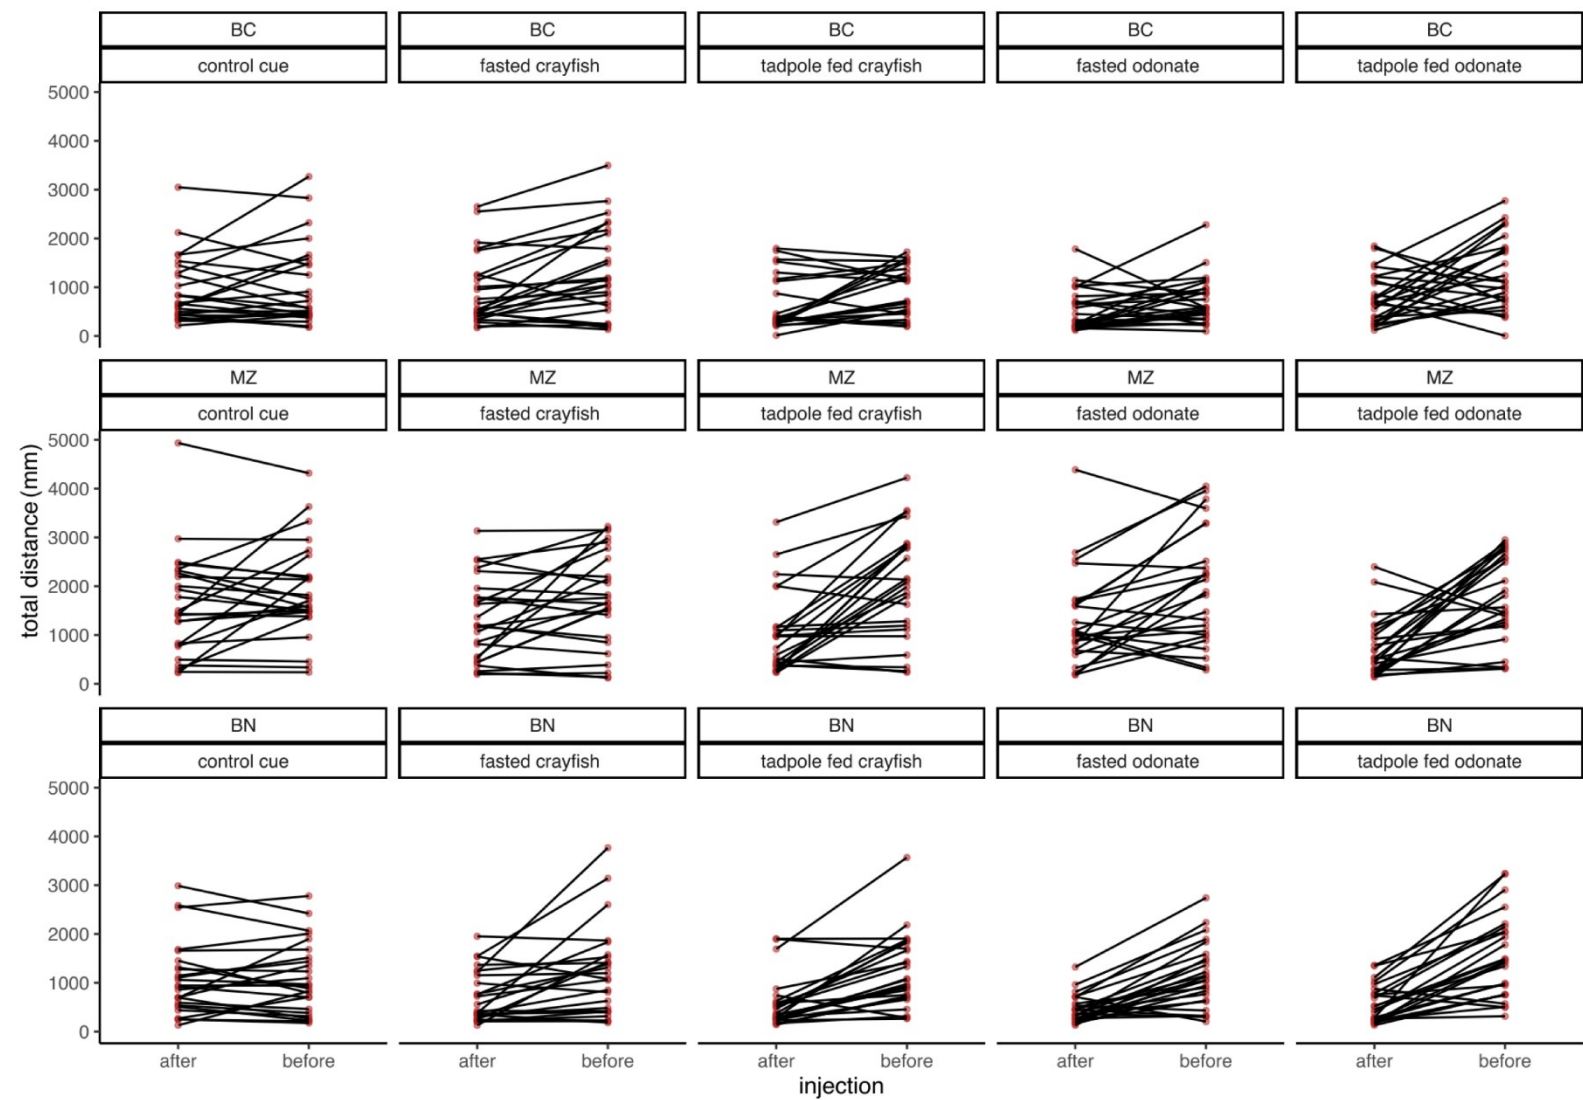

**Table S3.** Linear mixed model (LMM) with time frozen post cue injection as response variable. P-values adjusted using Dunnett method (4 tests per site; n = 375).

| Contrasts (difference)    | Population |       |             |      |      |                   |      |      |                   |
|---------------------------|------------|-------|-------------|------|------|-------------------|------|------|-------------------|
|                           | BC         |       |             | MZ   |      |                   | BN   |      |                   |
|                           | Est.       | t     | P           | Est. | t    | P                 | Est. | t    | P                 |
| Fasted crayfish - control | -1.74      | -0.13 | 0.10        | 1.65 | 0.12 | 0.10              | 30.6 | 2.33 | 0.07              |
| Fed crayfish - control    | 16.4       | 1.25  | 0.52        | 44.4 | 3.38 | <b>0.003</b>      | 63.4 | 4.81 | <b>&lt; 0.001</b> |
| Fasted odonate - control  | 38.3       | 2.91  | <b>0.01</b> | 50.8 | 3.87 | <b>&lt; 0.001</b> | 75.8 | 5.78 | <b>&lt; 0.001</b> |
| Fed odonate - control     | 40.1       | 3.02  | <b>0.01</b> | 85.4 | 6.51 | <b>&lt; 0.001</b> | 85.0 | 6.41 | <b>&lt; 0.001</b> |

**Figure S3.** Individual reaction norms showing time frozen before and after the injection of chemical cues (n = 375; n = 25 for each subplot).

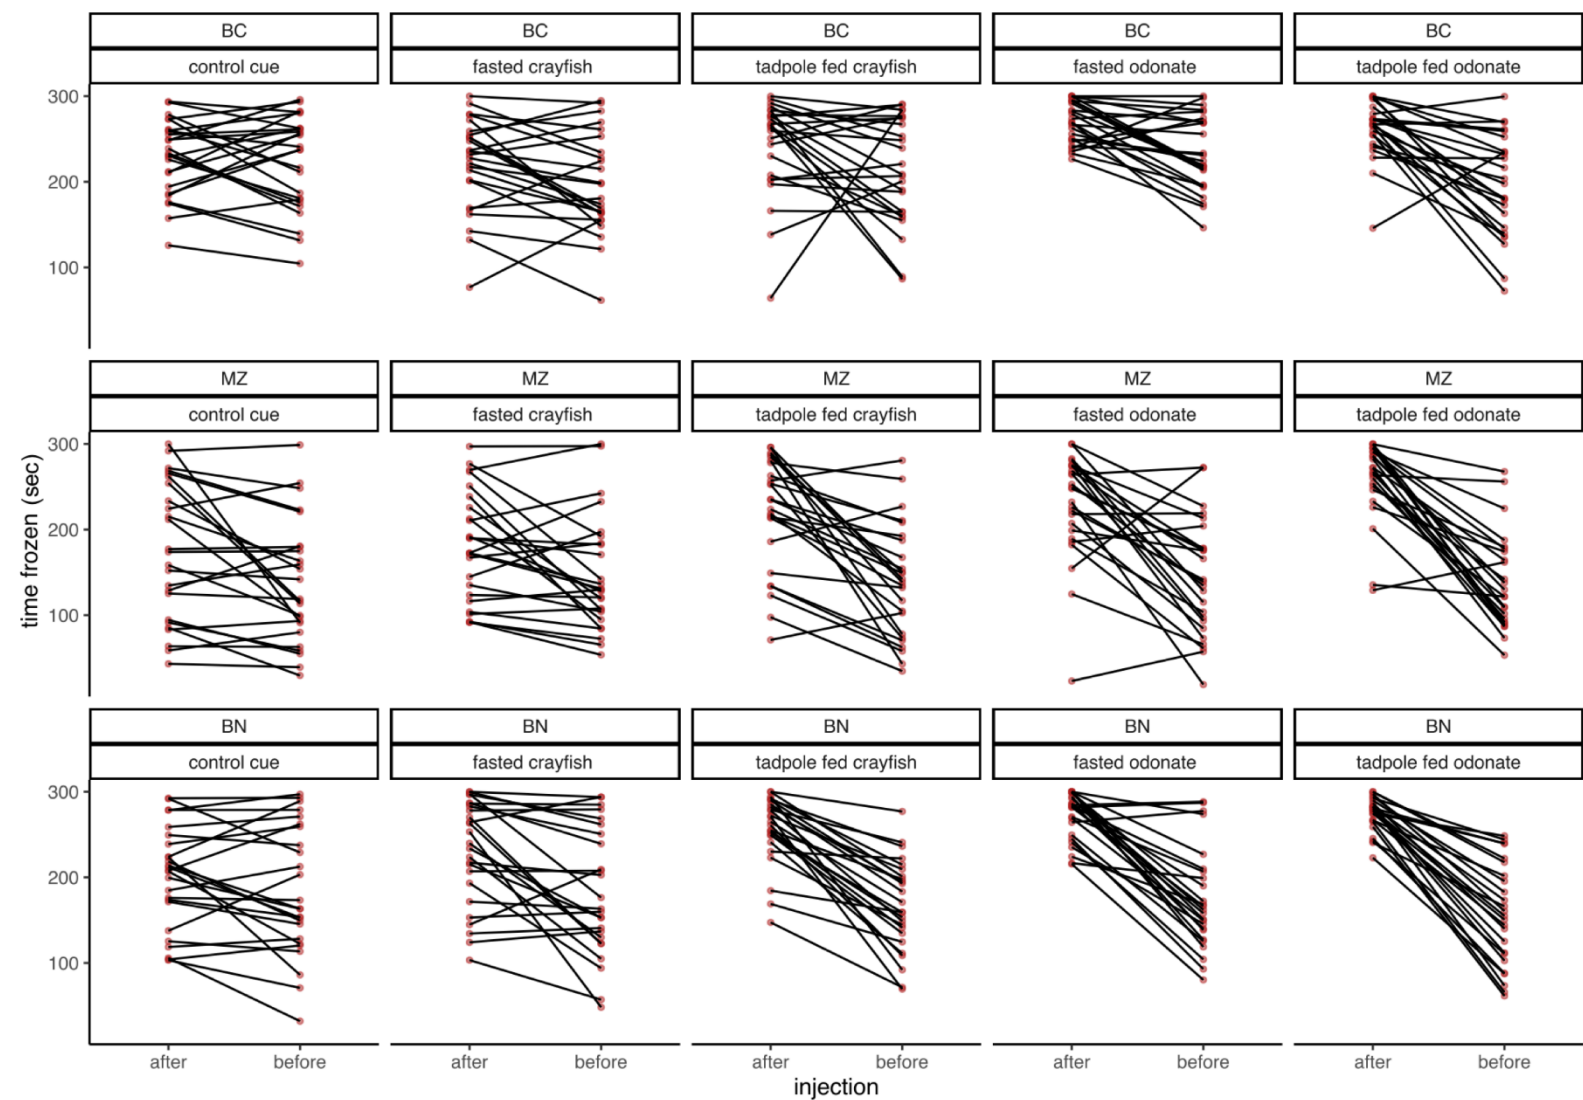

Supplement: jeb240465supp.pdf [file jeb240465supp.pdf]
